# Supplementary material
Source: PubMed Central journal article supplement (PMC7238552)
Supplement: NIHMS1569318-supplement-8.pdf [file NIHMS1569318-supplement-8.pdf]

| $\alpha$ v | $\beta$ 8 | C6D4 VH | C6D4 VL |
|------------|-----------|---------|---------|
| E121       |           |         | R33     |
| D148       |           |         | R33     |
| D218       |           |         | R35     |
|            |           |         |         |
|            | H118      |         | Y55     |
|            | D171      |         | W56     |
|            | N173      |         | K95     |
|            | N173      |         | S97     |
|            | D175      | S33     |         |
|            | D175      | R50     |         |
|            | K203      | D31     |         |

**Table S1** Interactions of  $\alpha$ v $\beta$ 8 with Fab C6D4, related to Fig. 2

| $\alpha$ v | $\beta$ 8                | C6-RGD3 VH | C6-RGD3 VL |
|------------|--------------------------|------------|------------|
| D148       |                          |            | R32        |
| F177       |                          |            | R37        |
|            |                          |            |            |
|            | D171                     |            | W60        |
|            | N173                     |            | K99        |
|            | N173                     |            | S101       |
|            | N173                     | Y101       |            |
|            | R201                     | T28        |            |
|            | Q202                     | R103       |            |
|            | K203                     | D31        |            |
|            | I204                     | Y100       |            |
|            | Mg <sup>2+</sup> (MIDAS) |            | D34        |

**Table S2** Interactions of  $\alpha$ v $\beta$ 8 with Fab C6-RGD3, related to Fig. 2

| C6-RGD3        |     |        | W2             |     |        | W3             |     |        | W3             |     |              | W4             |  |  |
|----------------|-----|--------|----------------|-----|--------|----------------|-----|--------|----------------|-----|--------------|----------------|--|--|
| C6D4           |     |        | L <sub>1</sub> |     |        | L <sub>1</sub> |     |        | L <sub>1</sub> |     |              | L <sub>1</sub> |  |  |
| $\alpha_v$     | 119 | KQEREP | $\alpha_v$     | 146 | DIDADG | $\alpha_v$     | 175 | GSFYWQ | $\alpha_v$     | 210 | TRTAQAIFDDSY |                |  |  |
| $\alpha_8$     | 124 | TPEKDP | $\alpha_8$     | 153 | NADPEG | $\alpha_8$     | 182 | GSFYWQ | $\alpha_8$     | 217 | TEVAPASYDDSY |                |  |  |
| $\alpha_5$     | 126 | EPLSDP | $\alpha_5$     | 155 | FSWAAG | $\alpha_5$     | 184 | GSYFWQ | $\alpha_5$     | 219 | TRQASSIYDDSY |                |  |  |
| $\alpha_{iib}$ | 121 | EAEKTP | $\alpha_{iib}$ | 160 | FSWDKR | $\alpha_{iib}$ | 187 | GGYYFL | $\alpha_{iib}$ | 223 | FDSSNPEYFDGY |                |  |  |

$\alpha_v$  subunit interactions with L-TGF- $\beta$ , C6D4, and C6-RGD3

= conserved

**Table S3** C6D4, C6-RGD3, L-TGF- $\beta$ 1 interactions with  $\alpha_v$  subunit  $\beta$ -propeller blades W2, W3, W4 aligned to other  $\alpha$ -subunits, related to Fig. 2

|                            |     |                                                          |
|----------------------------|-----|----------------------------------------------------------|
| pL-TGF-β1 <sup>a</sup>     | 192 | AHCSCDSKDNT-----LHVEING---FNSGRGDLATIHG-----MNRP         |
| hL-TGF-β1 <sup>b</sup>     | 192 | AHCSCDSRDNT-----LQVDING---FTTGRRGDLATIHG-----MNRP        |
| hL-TGF-β3                  | 202 | IHCPCHTFQPNGD-ILENIHEVMEIKFKGVDNEDDHGRGDLGRLKK---QKDHHNP |
| hL-TGF-β2                  | 204 | LHCPCTFVPSNNYIIPNKSEELERFAGIDGTSTYTSGDQKTIKSTRKKNSGKTP   |
|                            |     | == = = = =                                               |
| C6D4 CDR L <sub>1</sub>    | 30  | L-NSRTRK---N                                             |
| C6-RGD3 CDR L <sub>1</sub> | 30  | LGRGDLGRLKKN                                             |
|                            |     | = =                                                      |

interactions between αvβ8/L-TGF-β, αvβ8/C6D4, αvβ8/C6-RGD3

hydrophobic interactions between αvβ8/L-TGF-β

<sup>a</sup>porcine L-TGF-β1

<sup>b</sup>human L-TGF-β1

= conserved

**Table S4** C6D4 and C6-RGD3 CDRL1 loop alignment to TGF-β isoforms, related to Fig.2

| Primer Name                          | Sequence                                                |
|--------------------------------------|---------------------------------------------------------|
| C6-RGD3 CDRL1 loop F                 | 5'-GATCTGGGGCGCCTCAAGAAGAACGCCTTGGCTTGGTACCAGCAG-3'     |
| C6-RGD3 CDRL1 loop R                 | 5'-CTTGAGGCGCCCCAGATCTCCACGGCCGAGCAGACTCTGACTGGATTTG-3' |
| $\beta$ 8 I208R F                    | 5' CAGAAGATCTCTGGAAACAGAGATACACC-3'                     |
| $\beta$ 8 I208R R                    | 5'-GAAGTTTGGTTCGACATAATGC-3'                            |
| $\beta$ 8 Y172N F                    | 5'-CAATGCAGTGACAACAATTTAGACTGC-3'                       |
| $\beta$ 8 Y172N R                    | 5'-GCAGTCTAAATTGTTGTCAGTGCATTG-3'                       |
| $\beta$ 8 Y172M F                    | 5'-GATTCATAATCAATGCAGTGACATGAATTTAGACTGCATGCC-3'        |
| $\beta$ 8 Y172M R                    | 5'-GGCATGCAGTCTAAATTCATGTCACTGCATTGATTATGAATC-3'        |
| Y172A F                              | 5'-GATTCATAATCAATGCAGTGACGCCAATTTAGACTGCATGCC-3'        |
| Y172A R                              | 5'-GGCATGCAGTCTAAATTGGCGTCACTGCATTGATTATGAATC-3'        |
| $\beta$ 6 I183N F                    | 5'-CCCTTGCAAGTAGTAATCCATACTTCTG-3'                      |
| $\beta$ 6 I183N R                    | 5'-CAGAAGTATGGATTACTACTGCAAGGG-3'                       |
| Porcine L-TGF- $\beta$ 1 C4S RGE F   | 5'-CCGCCGGGGTGAAGTGGCCAC-3'                             |
| Porcine L-TGF- $\beta$ 1 C4S RGE R   | 5'-GTGGCCAGTTCACCCCGGCGG-3'                             |
| Porcine L-TGF- $\beta$ 1 C4S R249A F | 5'-ACCTGCACAGCTCCCGGCACCGCGCAGCCCTGG-3'.                |
| Porcine L-TGF- $\beta$ 1 C4S R249A R | 5'-GTGGCCAGTTCACCCCGGCGG-3'                             |
| Human L-TGF- $\beta$ 1 F             | 5'-ATGGCCACCCCGCTGG-3'                                  |
| Human L-TGF- $\beta$ 1 R             | 5'-CTCTACTAGTCTCGAGTTATCAGCTGCACTTGCAGGAGCGCAC-3'.      |
| Puromycin cassette F                 | 5'-ATCGTTTCAGACCCACCTCCC-3'                             |
| Puromycin cassette R                 | 5'-CTCTGCTTAGCGAATTCGTTAACTGGCACCGGG-3'                 |
| Human L-TGF- $\beta$ 1 R249A F       | 5'-CACCGCGCAGCCCTGGACACCAAC-3'                          |
| Human L-TGF- $\beta$ 1 R249A R       | 5'-CCAGGGCTGCGCGGTGCCGGGAG-3'                           |

**Table S5** Primer sequences, related to Biologic Resources Table
